# Supplementary material for: Risk factors and an optimized prediction model for urosepsis in diabetic patients with upper urinary tract stones
Source: Springer Nature journal article supplement (doi:10.1038/s41598-025-91787-2), 2025-03-10
Supplement: MOESM1 [file 41598_2025_91787_MOESM1_ESM.pdf]

# Risk Factors and an Optimized Prediction Model for Urosepsis in Diabetic Patients with Upper Urinary Tract Stones

Chongxiang Gao,<sup>1,2,3</sup> Jiancen Liu,<sup>3</sup> Dejuan Wang,<sup>1,2\*</sup> Minghui Liu,<sup>3,4\*</sup> and Jianguang Qiu<sup>1,2\*</sup>

<sup>1</sup>Department of Urology, The Sixth Affiliated Hospital, Sun Yat-sen University, Guangzhou, China

<sup>2</sup>Biomedical Innovation Center, The Sixth Affiliated Hospital, Sun Yat-sen University, Guangzhou, China

<sup>3</sup>Department of Urology, Xiangya Hospital, Central South University, Changsha, China

<sup>4</sup>National Clinical Research Center for Geriatric Disorders, Xiangya Hospital, Central South University, Changsha, China

\*Co-corresponding authors: Jianguang Qiu, [qiuji@mail.sysu.edu.cn](mailto:qiuji@mail.sysu.edu.cn);

Minghui Liu, [liuminghui199710@163.com](mailto:liuminghui199710@163.com);

Dejuan Wang, [wangdej@mail.sysu.edu.cn](mailto:wangdej@mail.sysu.edu.cn)

**Table S1** Results of colinearity detection

| <b>Variable</b>         | <b>VIF</b> |
|-------------------------|------------|
| Poor performance status | 1.170      |
| Sarcopenia              | 1.095      |
| Underweight             | 1.026      |
| Urine culture           | 1.120      |
| Urinary leukocyte count | 1.085      |
| Albumin-globulin ratio  | 1.062      |

VIF, variance inflation factor.

**Table S2** Results of ROC analysis

| <b>Dataset</b> | <b>Model</b> | <b>AUC</b> | <b>Accuracy</b> | <b>Sensitivity</b> | <b>Specificity</b> | <b>PLR</b> | <b>NLR</b> | <b>PPV</b> | <b>NPV</b> | <b>DOR</b> |
|----------------|--------------|------------|-----------------|--------------------|--------------------|------------|------------|------------|------------|------------|
| Training       | Initial      | 0.922      | 0.865           | 0.854              | 0.867              | 6.431      | 0.168      | 0.547      | 0.969      | 38.280     |
|                | Final        | 0.922      | 0.812           | 0.917              | 0.793              | 4.428      | 0.105      | 0.454      | 0.981      | 42.171     |
| Validation     | Initial      | 0.917      | 0.838           | 0.778              | 0.848              | 5.124      | 0.262      | 0.452      | 0.960      | 19.557     |
|                | Final        | 0.918      | 0.792           | 0.889              | 0.777              | 3.982      | 0.143      | 0.390      | 0.978      | 27.846     |

AUC, area under curve; ROC, receiver operating characteristic; PLR, positive likelihood ratio; NLR, negative likelihood ratio; PPV, positive predictive value; NPV, negative predictive value; DOR, diagnostic odds ratio.
